# Supplementary material for: Tuning the dynamic fragility of acrylic polymers by small molecules: the interplay of molecular structures
Source: Royal Society of Chemistry journal article supplement (doi:10.1039/d1sm00758k), 2021-01-01
Supplement: d1sm00758k1.pdf [file d1sm00758k1.pdf]

# Tuning the Dynamic Fragility of Acrylic Polymers by Small Molecules: The Interplay of Molecular Structure

Yuanbiao Liu, Gaopeng Shi, Guozhang Wu\*

*Shanghai Key Laboratory of Advanced Polymeric Materials, School of Materials Science & Engineering,  
East China University of Science & Technology, Shanghai 200237, China*

## 1 Segmental relaxation time ( $\tau_{\max}$ ) of different PBMA hybrids

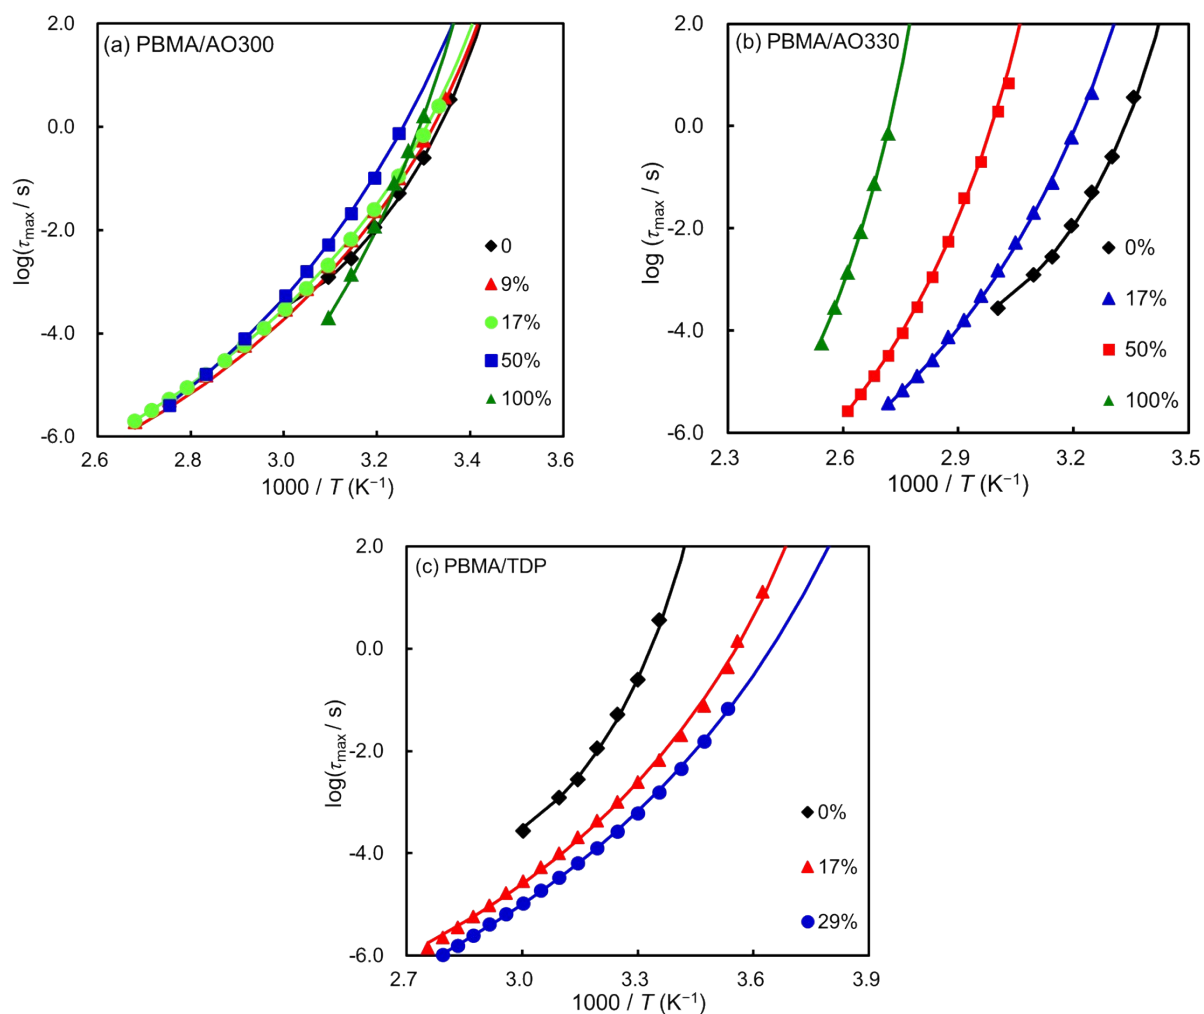

Figure S1. Temperature dependence of segmental relaxation time ( $\tau_{\max}$ ) at different concentrations for (a) PBMA/AO300, (b) PBMA/AO330, (c) PBMA/TDP hybrids. The solid symbols are experimental data, and solid lines are VFT equation fittings.

\* Corresponding author: G. Wu, E-mail: wgz@ecust.edu.cn
